# Supplementary material
Source: HighWire-hosted journal article supplement (https://molpharm.aspetjournals.org/highwire/filestream/88397/field_highwire_adjunct_files/0/641_supp_table_1.xlsx)
Supplement: 641_supp_table_1.xlsx [file 641_supp_table_1.xlsx]

## Sheet: lmfit.DEGs.fdr_0.05_fc_1.2
MOLPHARM-AR-2022-000641
Multi-omics analyses identify PREPL as a key regulator of protein trafficking, a pathway underlying Alzheimer’s disease pathogenesis
Mariana Lemos Duarte*1,3, Minghui Wang*2, Ivone Gomes*1 Chenge Liu1,4, Ali Sharma 1,5, Amanda K. Fakira1,6, Achla Gupta1, Seshat Mack1, Bin Zhang2@, Lakshmi A. Devi1@
Supplemental Table 1. PREPL DEGs between knock down (KD) and wild type (WT) samples.
Gene id	Symbol	logFC	AveExpr.1	AveExpr.2	t	P.Value	adj.P.Val
ENSMUSG00000025743	Sdc3	4.14368	5.95493	1.80593	15.8053	7.41167e-08	0.00102051
ENSMUSG00000001864	Aif1l	3.6438	4.50628	0.862165	13.0982	3.75098e-07	0.0018501
ENSMUSG00000021273	Fdft1	-2.06299	5.02438	7.08742	-12.9886	4.03101e-07	0.0018501
ENSMUSG00000022652	Morc1	7.30347	4.8527	-2.45771	12.3509	6.19604e-07	0.00213283
ENSMUSG00000023832	Acat2	-2.39454	3.51042	5.90476	-11.0133	1.63523e-06	0.00450311
ENSMUSG00000026208	Des	-3.01801	2.13757	5.15742	-10.4354	2.56896e-06	0.00583924
ENSMUSG00000070691	Runx3	1.76389	6.52963	4.76402	10.256	2.9686e-06	0.00583924
ENSMUSG00000006517	Mvd	-1.90645	4.98168	6.88838	-9.72918	4.59835e-06	0.00735529
ENSMUSG00000024743	Syt7	1.39503	6.84139	5.44695	9.67688	4.80773e-06	0.00735529
ENSMUSG00000021506	Pitx1	-3.06225	2.01249	5.07503	-9.39505	6.13329e-06	0.00737182
ENSMUSG00000041642	Kif21b	1.9217	5.49662	3.57011	9.39026	6.15904e-06	0.00737182
ENSMUSG00000045312	Lhfpl2	1.55904	5.35637	3.7971	9.20692	7.24046e-06	0.00737182
ENSMUSG00000086161	Gm15389	8.27645	3.11821	-5.15881	9.18903	7.3567e-06	0.00737182
ENSMUSG00000074151	Nlrc5	4.3314	3.17992	-1.15541	9.15278	7.59865e-06	0.00737182
ENSMUSG00000024378	Stard4	-1.58841	4.71336	6.30153	-9.09106	8.03089e-06	0.00737182
ENSMUSG00000066607	6030419C18Rik	2.19855	4.81788	2.61696	8.9029	9.52474e-06	0.00800366
ENSMUSG00000098112	Bin2	2.23445	4.14971	1.91273	8.86273	9.88178e-06	0.00800366
ENSMUSG00000001418	Glmp	-3.90942	0.0354566	3.94498	-8.75057	1.09592e-05	0.00838315
ENSMUSG00000026576	Atp1b1	1.32085	5.57527	4.25542	8.56678	1.30149e-05	0.00943168
ENSMUSG00000027315	Spint1	1.9901	4.90815	2.91936	8.47233	1.42335e-05	0.00966442
ENSMUSG00000059146	Ntrk3	1.32106	5.87015	4.55116	8.38854	1.54202e-05	0.00966442
ENSMUSG00000026687	Aldh9a1	-1.23808	6.92981	8.16806	-8.38708	1.54417e-05	0.00966442
ENSMUSG00000071547	Nt5dc2	-1.15779	5.84818	7.00597	-8.28169	1.70938e-05	0.0102332
ENSMUSG00000012017	Scarf2	2.59409	4.95415	2.36143	8.1482	1.94711e-05	0.0105503
ENSMUSG00000076441	Ass1	-1.31125	4.45233	5.76406	-8.14648	1.9504e-05	0.0105503
ENSMUSG00000054976	Nyap2	2.92527	3.65125	0.722209	8.08746	2.06712e-05	0.0105503
ENSMUSG00000079259	Trim71	1.18466	6.28092	5.0955	8.08661	2.06884e-05	0.0105503
ENSMUSG00000093930	Hmgcs1	-1.14885	5.68298	6.83179	-7.95193	2.36524e-05	0.0116309
ENSMUSG00000027419	Pcsk2	1.95493	3.78426	1.82763	7.91693	2.44969e-05	0.0116309
ENSMUSG00000021281	Tnfaip2	1.33173	5.4383	4.1047	7.86234	2.58807e-05	0.011638
ENSMUSG00000032338	Hcn4	1.80579	6.48286	4.68118	7.85011	2.62023e-05	0.011638
ENSMUSG00000027520	Zdbf2	1.13522	7.36206	6.22695	7.81158	2.72448e-05	0.0117066
ENSMUSG00000022177	Haus4	-1.22203	4.5912	5.81314	-7.78267	2.8057e-05	0.0117066
ENSMUSG00000034543	Morc2a	1.055	6.9165	5.86142	7.68388	3.10388e-05	0.0123491
ENSMUSG00000025137	Pcyt2	-1.23212	5.14461	6.37644	-7.67291	3.13906e-05	0.0123491
ENSMUSG00000022021	Diaph3	-1.10489	4.88604	5.99097	-7.45228	3.94856e-05	0.014854
ENSMUSG00000024330	Col11a2	2.10771	4.77792	2.67441	7.44138	3.99412e-05	0.014854
ENSMUSG00000033105	Lss	-1.50088	6.3895	7.89098	-7.41668	4.09945e-05	0.014854
ENSMUSG00000050424	Pnma5	-1.6918	3.62934	5.32098	-7.38917	4.22037e-05	0.0149001
ENSMUSG00000056602	Fry	-1.26298	3.99812	5.26111	-7.26883	4.7972e-05	0.0158687
ENSMUSG00000006378	Gcat	-1.97142	3.40449	5.37448	-7.25395	4.87436e-05	0.0158687
ENSMUSG00000084807	Gm13073	1.50819	5.11826	3.60791	7.24954	4.89748e-05	0.0158687
ENSMUSG00000024601	Isoc1	1.20024	6.11696	4.91511	7.23852	4.95573e-05	0.0158687
ENSMUSG00000019564	Arid3a	1.61511	5.61959	4.01128	7.18473	5.25142e-05	0.0162937
ENSMUSG00000058454	Dhcr7	-1.78152	5.29199	7.07373	-7.17184	5.32511e-05	0.0162937
ENSMUSG00000021765	Fst	2.15674	4.72769	2.57532	7.13062	5.56847e-05	0.0165542
ENSMUSG00000074480	Mex3a	1.45816	5.71384	4.26097	7.11713	5.65073e-05	0.0165542
ENSMUSG00000003948	Mmd	1.21989	6.07057	4.85218	7.08493	5.85249e-05	0.0165667
ENSMUSG00000027952	Pmvk	-1.70665	5.04678	6.7532	-7.07821	5.89561e-05	0.0165667
ENSMUSG00000054013	Tmem179	2.33189	4.29864	1.967	7.02616	6.24139e-05	0.0171875
ENSMUSG00000063632	Sox11	1.261	7.71727	6.45604	6.99995	6.42386e-05	0.0173432
ENSMUSG00000054074	Skida1	1.32149	4.59753	3.27628	6.90459	7.13869e-05	0.0180532
ENSMUSG00000015829	Tnr	3.25367	2.17549	-1.07805	6.90059	7.17058e-05	0.0180532
ENSMUSG00000028964	Park7	-0.982446	7.36155	8.34416	-6.89958	7.17861e-05	0.0180532
ENSMUSG00000074476	Spc24	-1.05762	4.6076	5.66493	-6.89549	7.21132e-05	0.0180532
ENSMUSG00000058258	Idi1	-1.43647	2.91247	4.3489	-6.82239	7.82499e-05	0.0189987
ENSMUSG00000000594	Gm2a	-1.83919	3.24067	5.07892	-6.8153	7.88746e-05	0.0189987
ENSMUSG00000048988	Elfn1	1.94831	3.8351	1.89178	6.79686	8.0526e-05	0.0189987
ENSMUSG00000058441	Panx2	2.92925	2.46838	-0.467231	6.77204	8.2808e-05	0.0189987
ENSMUSG00000021670	Hmgcr	-0.986567	7.29629	8.28321	-6.7689	8.31018e-05	0.0189987
ENSMUSG00000034361	Cpne2	2.70121	3.99856	1.30046	6.75759	8.41687e-05	0.0189987
ENSMUSG00000027215	Cd82	2.67883	3.34698	0.653444	6.7324	8.65997e-05	0.0192321
ENSMUSG00000022456	2021-09-03	1.99331	3.63042	1.63317	6.68809	9.10651e-05	0.0199028
ENSMUSG00000029126	Nsg1	1.91141	3.94041	2.02151	6.66854	9.3115e-05	0.0200328
ENSMUSG00000032511	Scn5a	3.07599	2.72224	-0.339786	6.64679	9.54536e-05	0.02022
ENSMUSG00000025203	Scd2	-1.27411	9.4001	10.675	-6.60811	9.97751e-05	0.0205314
ENSMUSG00000026442	Nfasc	1.64226	4.81414	3.16933	6.59748	0.000100999	0.0205314
ENSMUSG00000061751	Kalrn	0.913894	6.84025	5.92666	6.56932	0.000104323	0.0205314
ENSMUSG00000028977	Casz1	1.40974	6.23472	4.8239	6.56294	0.000105092	0.0205314
ENSMUSG00000086290	Snhg12	1.06102	7.89566	6.83456	6.55967	0.000105489	0.0205314
ENSMUSG00000028671	Gale	-1.49412	4.36578	5.86128	-6.55654	0.00010587	0.0205314
ENSMUSG00000049775	Tmsb4x	2.02828	3.43698	1.4153	6.52329	0.000110015	0.0210389
ENSMUSG00000036251	Trpm8	5.15716	0.526588	-4.63049	6.50155	0.000112822	0.0212801
ENSMUSG00000052957	Gas1	-5.72767	-3.01039	2.71867	-6.46929	0.00011713	0.0212844
ENSMUSG00000104348	Gm37691	5.53859	0.378974	-5.15881	6.46448	0.000117788	0.0212844
ENSMUSG00000039414	Heatr5b	-0.998187	5.54044	6.53892	-6.46439	0.0001178	0.0212844
ENSMUSG00000017692	Rhbdl3	1.45771	4.26486	2.80907	6.45549	0.000119028	0.0212844
ENSMUSG00000025151	Maged1	-0.949118	8.25532	9.20474	-6.41517	0.000124767	0.0218759
ENSMUSG00000018042	Cyb5r3	-1.00519	7.78053	8.78544	-6.41007	0.000125514	0.0218759
ENSMUSG00000035112	Wnk4	1.41683	4.03809	2.62426	6.39641	0.000127539	0.0219511
ENSMUSG00000033209	Ttc28	1.13895	6.69726	5.55758	6.35699	0.000133587	0.022665
ENSMUSG00000031349	Nsdhl	-2.49068	2.22473	4.71046	-6.3429	0.000135824	0.022665
ENSMUSG00000031103	Elf4	2.12107	2.96834	0.847592	6.33791	0.000136625	0.022665
ENSMUSG00000021182	Ccdc88c	1.54875	4.36874	2.82282	6.30429	0.000142165	0.0229294
ENSMUSG00000021957	Tkt	-1.06466	7.28885	8.35355	-6.29505	0.000143731	0.0229294
ENSMUSG00000027210	Meis2	0.886524	5.78097	4.89458	6.2927	0.000144131	0.0229294
ENSMUSG00000037278	Tmem97	-0.929116	4.96913	5.89799	-6.28822	0.000144898	0.0229294
ENSMUSG00000035697	Arhgap45	0.878678	5.9965	5.1179	6.27869	0.000146546	0.0229294
ENSMUSG00000052534	Pbx1	-3.23188	-0.517947	2.71809	-6.25574	0.000150601	0.0232992
ENSMUSG00000040818	Dennd6a	-1.32147	3.60059	4.9242	-6.20073	0.000160823	0.0242608
ENSMUSG00000038539	Atf5	1.4289	7.74915	6.31987	6.1928	0.000162357	0.0242608
ENSMUSG00000036242	3632451O06Rik	-1.75376	2.4036	4.15405	-6.19151	0.000162608	0.0242608
ENSMUSG00000031963	Bmper	2.74141	1.96452	-0.778903	6.17384	0.000166093	0.0242608
ENSMUSG00000014303	Glis2	1.17629	5.66159	4.48944	6.1476	0.000171416	0.0242608
ENSMUSG00000021453	Gadd45g	-1.70999	4.76069	6.46961	-6.13887	0.00017323	0.0242608
ENSMUSG00000009097	Tbx1	2.11705	4.57852	2.45483	6.13575	0.000173882	0.0242608
ENSMUSG00000036158	Prickle1	-2.40767	0.418182	2.82762	-6.1327	0.000174522	0.0242608
ENSMUSG00000022871	Fetub	1.42046	5.25536	3.83681	6.11483	0.000178328	0.0242608
ENSMUSG00000000782	Tcf7	1.75057	4.17282	2.42281	6.09933	0.000181703	0.0242608
ENSMUSG00000079011	Gm11033	-1.42075	3.2888	4.70664	-6.09578	0.000182485	0.0242608
ENSMUSG00000000753	Serpinf1	0.956197	5.25547	4.29852	6.09402	0.000182876	0.0242608
ENSMUSG00000005124	Wisp1	2.26583	4.09393	1.83526	6.09157	0.000183418	0.0242608
ENSMUSG00000037960	Card19	-1.11968	5.49452	6.61429	-6.08014	0.000185978	0.0242608
ENSMUSG00000071369	Map3k5	1.41535	4.89344	3.48224	6.07999	0.000186012	0.0242608
ENSMUSG00000079349	Magea5	-3.20173	-0.297261	2.9048	-6.07346	0.000187491	0.0242608
ENSMUSG00000026675	Hsd17b7	-1.126	4.29037	5.41582	-6.06709	0.000188948	0.0242608
ENSMUSG00000001467	Cyp51	-1.21217	6.75215	7.96502	-6.06478	0.000189477	0.0242608
ENSMUSG00000022865	Cxadr	1.48803	4.83684	3.34298	6.06103	0.000190344	0.0242608
ENSMUSG00000037933	Bicd2	-0.951022	6.56799	7.51924	-6.05366	0.000192057	0.0242608
ENSMUSG00000068699	Flnc	1.13251	9.03037	7.89805	6.04106	0.000195024	0.0244117
ENSMUSG00000020648	Dus4l	0.990123	5.41485	4.42491	6.0167	0.000200905	0.024733
ENSMUSG00000007817	Zmiz1	-0.83269	6.19148	7.02419	-6.01557	0.000201184	0.024733
ENSMUSG00000025492	Ifitm3	-1.28554	3.5097	4.79609	-5.98071	0.000209949	0.025157
ENSMUSG00000015652	Steap1	2.37582	2.5824	0.214018	5.97137	0.00021237	0.025157
ENSMUSG00000002504	Slc9a3r2	1.09154	4.63892	3.5471	5.97064	0.00021256	0.025157
ENSMUSG00000034403	Pja1	-5.99678	-3.56016	2.4377	-5.9682	0.000213197	0.025157
ENSMUSG00000032816	Igdcc4	1.8323	3.51453	1.68621	5.96602	0.000213768	0.025157
ENSMUSG00000021756	Il6st	0.879776	6.65903	5.77942	5.95573	0.000216488	0.0252612
ENSMUSG00000070720	Tmem200b	1.07092	5.55088	4.48243	5.93173	0.000222976	0.0257996
ENSMUSG00000041708	Mpped1	2.4866	2.52652	0.0426243	5.90837	0.000229498	0.02626
ENSMUSG00000059213	Ddn	2.06575	3.59212	1.53148	5.90389	0.00023077	0.02626
ENSMUSG00000032271	Nnmt	4.36516	1.20623	-3.16638	5.89367	0.000233707	0.0263483
ENSMUSG00000040268	Plekha1	1.05639	5.00411	3.94578	5.87294	0.000239785	0.0263483
ENSMUSG00000049985	Ankrd55	4.41229	1.47432	-2.94902	5.87064	0.000240471	0.0263483
ENSMUSG00000021823	Vcl	-1.00777	5.7647	6.77229	-5.86178	0.000243127	0.0263483
ENSMUSG00000002010	Idh3g	-0.844829	6.39522	7.24009	-5.85715	0.000244532	0.0263483
ENSMUSG00000020538	Srebf1	-1.08437	8.2411	9.32564	-5.85634	0.000244776	0.0263483
ENSMUSG00000026114	Cnga3	1.43576	5.32762	3.88508	5.8558	0.00024494	0.0263483
ENSMUSG00000030785	Cox6a2	1.48392	4.60901	3.12263	5.84268	0.00024897	0.0263628
ENSMUSG00000058743	Kcnj14	2.97387	1.62042	-1.35621	5.84103	0.00024948	0.0263628
ENSMUSG00000006289	Osgep	-1.18667	4.7594	5.94596	-5.8365	0.00025089	0.0263628
ENSMUSG00000007872	Id3	1.52483	6.0316	4.51346	5.82978	0.000253001	0.0263628
ENSMUSG00000035314	Gdpd5	1.04245	5.41085	4.37065	5.82457	0.000254648	0.0263628
ENSMUSG00000024197	Plin3	-1.0818	5.76205	6.84403	-5.80981	0.000259382	0.0266524
ENSMUSG00000036333	Kidins220	0.759405	8.44233	7.68287	5.78977	0.00026596	0.0267853
ENSMUSG00000041939	Mvk	-1.50058	3.65589	5.15666	-5.78047	0.000269073	0.0267853
ENSMUSG00000032193	Ldlr	-1.87131	6.0328	7.90456	-5.77524	0.000270844	0.0267853
ENSMUSG00000078945	Naip2	0.964307	5.09083	4.12775	5.77504	0.000270911	0.0267853
ENSMUSG00000040046	Tph1	1.03696	5.14447	4.10481	5.77099	0.00027229	0.0267853
ENSMUSG00000073434	Wdr90	-1.01554	4.99089	6.00601	-5.77082	0.000272347	0.0267853
ENSMUSG00000036800	Fam135b	5.0068	1.94929	-3.04552	5.74995	0.000279578	0.0271114
ENSMUSG00000023939	Mrpl14	-0.978764	4.62521	5.6049	-5.74988	0.000279601	0.0271114
ENSMUSG00000022351	Sqle	-0.936259	6.55431	7.49079	-5.73945	0.00028329	0.0271114
ENSMUSG00000029482	Aacs	-0.961481	4.90566	5.86721	-5.73382	0.000285307	0.0271114
ENSMUSG00000021194	Chga	-0.863681	7.36497	8.22852	-5.73326	0.000285508	0.0271114
ENSMUSG00000022440	C1qtnf6	-0.813376	5.46942	6.28297	-5.71611	0.000291744	0.0275139
ENSMUSG00000027071	P2rx3	1.25556	5.29341	4.03195	5.68155	0.000304765	0.0283668
ENSMUSG00000013236	Ptprs	1.41513	8.19172	6.77634	5.67482	0.000307372	0.0283668
ENSMUSG00000075327	Zbtb2	1.2333	5.75994	4.52331	5.67125	0.000308769	0.0283668
ENSMUSG00000028654	Mycl	1.84286	3.73202	1.88356	5.67058	0.000309029	0.0283668
ENSMUSG00000056596	Trnp1	2.6437	2.57338	-0.0735634	5.66232	0.000312282	0.0284755
ENSMUSG00000024059	Clip4	1.86501	2.6359	0.769156	5.65322	0.00031591	0.0286168
ENSMUSG00000029288	Ambn	-4.10447	-2.3992	1.70247	-5.64443	0.000319457	0.028749
ENSMUSG00000032714	Syde1	1.11853	4.44978	3.3344	5.63424	0.000323623	0.0289349
ENSMUSG00000027303	Ptpra	-1.00569	5.27489	6.2813	-5.61331	0.000332369	0.0295251
ENSMUSG00000000278	Scpep1	-0.786106	6.9271	7.71343	-5.60148	0.000337424	0.0296638
ENSMUSG00000021559	Dapk1	-0.966144	6.87171	7.83763	-5.59845	0.000338732	0.0296638
ENSMUSG00000038241	Cep250	-0.979595	4.37824	5.35896	-5.59462	0.000340393	0.0296638
ENSMUSG00000039220	Ppp1r10	0.864128	7.8814	7.01726	5.56984	0.000351359	0.0304268
ENSMUSG00000075705	Msrb1	-1.38487	3.6914	5.07678	-5.56331	0.000354313	0.0304628
ENSMUSG00000031245	Hmgn5	-0.925725	4.80772	5.73398	-5.55917	0.0003562	0.0304628
ENSMUSG00000021340	Gpld1	-2.79768	-0.658326	2.13908	-5.54509	0.000362693	0.0307116
ENSMUSG00000026932	Nacc2	1.4136	3.49147	2.08027	5.54321	0.00036357	0.0307116
ENSMUSG00000009633	G0s2	3.84715	1.97562	-1.88915	5.53355	0.000368114	0.0309058
ENSMUSG00000060992	Copz1	-0.833095	6.43461	7.26767	-5.52881	0.000370366	0.0309065
ENSMUSG00000024892	Pcx	-0.8296	7.16819	7.99788	-5.51664	0.000376214	0.0310856
ENSMUSG00000056579	Tug1	1.53263	5.57114	4.03744	5.51497	0.000377028	0.0310856
ENSMUSG00000036023	Parp2	-0.99031	4.13413	5.12481	-5.49051	0.000389117	0.0316525
ENSMUSG00000026639	Lamb3	4.70459	0.319664	-4.38483	5.49026	0.00038924	0.0316525
ENSMUSG00000032815	Fanca	-0.924496	4.87853	5.80376	-5.48322	0.000392801	0.0316525
ENSMUSG00000032827	Ppp1r9a	0.936024	5.4231	4.48609	5.47826	0.000395329	0.0316525
ENSMUSG00000000794	Kcnn3	-1.05525	4.49279	5.54932	-5.47779	0.000395568	0.0316525
ENSMUSG00000004558	Ndrg2	-1.46331	4.39858	5.86121	-5.47364	0.000397697	0.0316525
ENSMUSG00000110670	Gm30132	4.8518	0.22205	-4.63049	5.46621	0.000401544	0.0317751
ENSMUSG00000068876	Cgn	-1.47645	1.95424	3.43207	-5.45755	0.000406075	0.0319451
ENSMUSG00000040865	Ino80d	0.907015	6.14777	5.24171	5.45328	0.000408333	0.0319451
ENSMUSG00000052837	Junb	1.06207	8.46248	7.40055	5.43523	0.000418016	0.0325179
ENSMUSG00000034336	Ina	0.888774	7.34258	6.45387	5.42953	0.000421126	0.0325757
ENSMUSG00000037101	Ttc29	2.97726	1.38844	-1.58653	5.41611	0.000428546	0.0329645
ENSMUSG00000047787	Flrt1	1.71758	4.69811	2.99108	5.41093	0.000431447	0.0330033
ENSMUSG00000031371	Haus7	-1.19414	3.15015	4.34207	-5.40075	0.000437215	0.033168
ENSMUSG00000026579	F5	-3.32474	-1.18272	2.14048	-5.39864	0.000438418	0.033168
ENSMUSG00000031168	Ebp	-1.124	3.43411	4.55851	-5.38883	0.000444071	0.0332474
ENSMUSG00000028961	Pgd	-0.87044	5.7006	6.57132	-5.38844	0.000444297	0.0332474
ENSMUSG00000027329	Spef1	1.66275	2.69038	1.02842	5.3612	0.000460418	0.0342675
ENSMUSG00000021748	Pdhb	-0.724059	6.40163	7.12573	-5.3526	0.000465635	0.0344695
ENSMUSG00000055745	Ldoc1l	0.93454	5.28879	4.35685	5.33782	0.000474757	0.0348415
ENSMUSG00000026278	Bok	-0.833295	6.91371	7.74666	-5.33445	0.000476865	0.0348415
ENSMUSG00000026600	Soat1	-0.912614	4.49274	5.40517	-5.33224	0.000478251	0.0348415
ENSMUSG00000040836	Gpr161	1.19085	4.64188	3.45609	5.32703	0.00048154	0.0348944
ENSMUSG00000031410	Nxf7	-1.60884	4.75256	6.36056	-5.31065	0.000492035	0.0348944
ENSMUSG00000000296	Tpd52l1	-2.99642	-0.306264	2.69068	-5.30775	0.000493918	0.0348944
ENSMUSG00000020650	Bcap29	0.749026	6.43865	5.68933	5.30768	0.000493965	0.0348944
ENSMUSG00000058672	Tubb2a	-0.930391	6.10646	7.03693	-5.30018	0.000498869	0.0348944
ENSMUSG00000025511	Tspan4	0.68496	6.90611	6.2212	5.29889	0.000499717	0.0348944
ENSMUSG00000027187	Cat	-1.30493	3.73107	5.03826	-5.29812	0.000500225	0.0348944
ENSMUSG00000022034	Esco2	-1.11492	3.37428	4.48758	-5.29529	0.000502099	0.0348944
ENSMUSG00000063415	Cyp26b1	1.01912	4.47468	3.4568	5.29309	0.00050356	0.0348944
ENSMUSG00000082082	Gm13230	1.31496	4.85044	3.53385	5.28342	0.000510031	0.0348944
ENSMUSG00000038375	Trp53inp2	-0.71105	6.39361	7.10466	-5.28166	0.000511214	0.0348944
ENSMUSG00000022031	Elp3	-0.83718	5.59875	6.43599	-5.27862	0.000513277	0.0348944
ENSMUSG00000036854	Hspb6	-1.59374	2.20431	3.79796	-5.27824	0.000513534	0.0348944
ENSMUSG00000062760	1810041L15Rik	0.737769	7.87964	7.14189	5.27581	0.000515188	0.0348944
ENSMUSG00000030225	Dera	-1.1028	3.73697	4.8412	-5.27099	0.00051848	0.0348944
ENSMUSG00000033207	Mamdc2	1.46968	6.84102	5.36859	5.26947	0.000519526	0.0348944
ENSMUSG00000015846	Rxra	1.47267	3.64242	2.17519	5.26487	0.000522693	0.0349367
ENSMUSG00000024026	Glo1	-0.777547	5.75378	6.53148	-5.25545	0.000529259	0.0350396
ENSMUSG00000035198	Tubg1	-0.737316	7.34061	8.07774	-5.25247	0.000531352	0.0350396
ENSMUSG00000047786	Lix1	-2.03875	1.56168	3.60537	-5.251	0.000532392	0.0350396
ENSMUSG00000042812	Foxf1	2.57168	2.50666	-0.0553281	5.24649	0.000535581	0.0350396
ENSMUSG00000034194	R3hcc1	-1.03549	3.55737	4.59159	-5.24415	0.000537245	0.0350396
ENSMUSG00000021178	Psmc1	-0.78902	6.53511	7.32402	-5.24019	0.000540077	0.0350396
ENSMUSG00000025350	Rdh5	1.55269	3.35749	1.79985	5.23745	0.000542047	0.0350396
ENSMUSG00000021843	Ktn1	-0.69884	6.28184	6.9807	-5.22291	0.000552623	0.0355491
ENSMUSG00000071773	Rhox1	-1.52418	2.88161	4.40336	-5.21699	0.000556992	0.0355491
ENSMUSG00000067369	Trmt2b	-1.38911	2.14434	3.5351	-5.21158	0.000561013	0.0355491
ENSMUSG00000021830	Txndc16	-0.923204	3.9203	4.84286	-5.20648	0.00056484	0.0355491
ENSMUSG00000024617	Camk2a	-0.980122	3.90534	4.88694	-5.20242	0.000567901	0.0355491
ENSMUSG00000038738	Shank1	1.56958	3.12791	1.5606	5.19873	0.000570702	0.0355491
ENSMUSG00000021939	Ctsb	-0.819692	8.05628	8.87606	-5.19627	0.000572582	0.0355491
ENSMUSG00000080069	Gm41	3.18656	1.10161	-2.09471	5.18984	0.000577515	0.0355491
ENSMUSG00000005045	Chd5	0.740419	7.66525	6.92483	5.18415	0.000581911	0.0355491
ENSMUSG00000044258	Ctla2a	-3.45666	1.82847	5.29039	-5.18413	0.00058193	0.0355491
ENSMUSG00000004891	Nes	1.08789	6.20908	5.11865	5.18367	0.000582287	0.0355491
ENSMUSG00000052397	Ezr	-0.730662	6.28198	7.01267	-5.1807	0.000584603	0.0355491
ENSMUSG00000021895	Arhgef3	-0.806899	5.06944	5.87577	-5.17888	0.000586021	0.0355491
ENSMUSG00000037860	Aim2	1.28624	4.1322	2.85054	5.17716	0.000587374	0.0355491
ENSMUSG00000033799	Fam208b	0.930306	7.0147	6.0851	5.17464	0.000589354	0.0355491
ENSMUSG00000018217	Pmp22	0.819064	6.59992	5.77985	5.17226	0.000591236	0.0355491
ENSMUSG00000048186	Bend7	0.800517	5.2793	4.4799	5.16112	0.000600109	0.0359257
ENSMUSG00000039542	Ncam1	0.768787	9.07931	8.31026	5.15539	0.000604735	0.0360459
ENSMUSG00000050272	Dscam	1.42643	3.00101	1.57281	5.15139	0.000607977	0.0360829
ENSMUSG00000053080	2700081O15Rik	0.983195	7.01104	6.02767	5.1345	0.000621913	0.0363819
ENSMUSG00000025608	Podxl	0.698801	6.39203	5.69331	5.13382	0.000622476	0.0363819
ENSMUSG00000038914	Dido1	1.26428	5.63659	4.37839	5.13292	0.000623235	0.0363819
ENSMUSG00000051335	Gfod1	1.10402	4.0328	2.93044	5.12866	0.000626808	0.0363819
ENSMUSG00000051910	Sox6	1.8228	2.32502	0.500253	5.12834	0.00062708	0.0363819
ENSMUSG00000045136	Tubb2b	-1.19951	6.02988	7.22977	-5.12365	0.000631042	0.0363819
ENSMUSG00000053522	Lgals7	-3.89737	-2.64191	1.25571	-5.11914	0.000634875	0.0363819
ENSMUSG00000025950	Idh1	-0.941848	5.28474	6.22649	-5.117	0.00063671	0.0363819
ENSMUSG00000000889	Dbh	-1.17292	3.21873	4.39137	-5.1169	0.000636796	0.0363819
ENSMUSG00000021913	Ogdhl	-0.704157	6.25044	6.95462	-5.10644	0.000645821	0.0367451
ENSMUSG00000072568	Fam84b	1.40117	4.62747	3.22722	5.10177	0.000649896	0.0368247
ENSMUSG00000021877	Arf4	-0.708285	6.16576	6.874	-5.09339	0.000657274	0.0369977
ENSMUSG00000046311	Zfp62	0.861697	5.16614	4.30573	5.09221	0.000658323	0.0369977
ENSMUSG00000020917	Acly	-0.957396	9.4139	10.3705	-5.08792	0.000662142	0.0370611
ENSMUSG00000038042	Ptpdc1	-0.871524	4.82268	5.69491	-5.08475	0.000664984	0.0370695
ENSMUSG00000046432	Bex3	-0.749789	7.37555	8.12561	-5.08135	0.000668042	0.0370898
ENSMUSG00000026113	Inpp4a	-0.833539	5.14122	5.97474	-5.07634	0.000672576	0.0371916
ENSMUSG00000023944	Hsp90ab1	-0.911264	11.2308	12.1417	-5.07069	0.000677731	0.0372919
ENSMUSG00000031506	Ptpn7	1.81053	2.67696	0.869395	5.06843	0.000679806	0.0372919
ENSMUSG00000033697	Arhgap39	0.942337	5.96778	5.02398	5.04882	0.000698082	0.0379838
ENSMUSG00000039377	Hlx	-1.043	5.45081	6.49381	-5.04816	0.000698712	0.0379838
ENSMUSG00000042507	Elmsan1	1.20979	7.96526	6.75528	5.04606	0.000700697	0.0379838
ENSMUSG00000028214	Gem	-0.930139	4.77517	5.70418	-5.04196	0.000704601	0.0380457
ENSMUSG00000025878	Uimc1	-0.900941	4.37079	5.27181	-5.02287	0.000723096	0.038791
ENSMUSG00000020181	Nav3	0.738486	6.09629	5.35717	5.0214	0.000724537	0.038791
ENSMUSG00000043943	Naalad2	-1.73465	1.45998	3.19682	-5.01746	0.000728431	0.038791
ENSMUSG00000078651	Aoc2	0.957925	5.57994	4.62407	5.01621	0.000729672	0.038791
ENSMUSG00000015085	Entpd2	1.95532	2.18745	0.230287	5.00758	0.000738289	0.0390981
ENSMUSG00000025937	Lactb2	-0.969117	4.22475	5.19215	-4.99803	0.000747949	0.0394162
ENSMUSG00000028631	Kcnq4	2.93087	2.62598	-0.316742	4.99492	0.000751122	0.0394162
ENSMUSG00000021725	Parp8	0.689931	7.47085	6.78103	4.9932	0.000752884	0.0394162
ENSMUSG00000025558	Dock9	-0.868455	4.59412	5.46187	-4.98564	0.000760682	0.0395811
ENSMUSG00000000876	Pxmp4	-1.36823	3.12256	4.49206	-4.98458	0.000761782	0.0395811
ENSMUSG00000022000	Zc3h13	-0.679762	5.64896	6.32864	-4.97912	0.000767477	0.0397167
ENSMUSG00000021451	Sema4d	-0.700719	7.33031	8.03114	-4.97557	0.00077121	0.0397167
ENSMUSG00000026817	Ak1	-0.69585	5.78581	6.48182	-4.97168	0.000775313	0.0397167
ENSMUSG00000059325	Hopx	-2.29186	0.669847	2.96377	-4.96872	0.000778462	0.0397167
ENSMUSG00000024610	Cd74	1.22574	7.32878	6.1018	4.96782	0.000779412	0.0397167
ENSMUSG00000061578	Ksr2	1.33413	3.20051	1.86359	4.96298	0.000784586	0.0397167
ENSMUSG00000038331	Satb2	0.88144	4.82064	3.94132	4.95637	0.000791713	0.0397167
ENSMUSG00000032035	Ets1	-0.720179	5.80109	6.52123	-4.95539	0.00079277	0.0397167
ENSMUSG00000042216	Sgsm1	-0.879646	5.46468	6.34464	-4.95427	0.00079399	0.0397167
ENSMUSG00000096977	Gm10827	1.69549	4.25369	2.5637	4.95184	0.000796631	0.0397167
ENSMUSG00000058881	Zfp516	0.724113	6.85005	6.12595	4.9507	0.000797878	0.0397167
ENSMUSG00000025268	Maged2	-1.21274	4.26022	5.47516	-4.94967	0.000799007	0.0397167
ENSMUSG00000035429	Ptprh	2.55538	1.1653	-1.38955	4.94529	0.000803811	0.0398118
ENSMUSG00000029465	Arpc3	-0.757189	5.9823	6.73932	-4.94108	0.000808462	0.0398986
ENSMUSG00000052142	Rasal3	-1.03493	4.07516	5.1122	-4.93074	0.000820005	0.0403238
ENSMUSG00000036751	Cox6b1	-1.15924	5.21135	6.37092	-4.92346	0.000828232	0.0404782
ENSMUSG00000022463	Srebf2	-0.958616	9.02887	9.98791	-4.92277	0.000829026	0.0404782
ENSMUSG00000020905	Usp43	1.81372	2.20605	0.394493	4.91912	0.000833191	0.0405378
ENSMUSG00000029470	P2rx4	-0.739571	4.77668	5.51603	-4.91596	0.000836809	0.0405705
ENSMUSG00000056367	Actr3b	-0.76212	4.87517	5.63786	-4.90644	0.000847837	0.0408877
ENSMUSG00000027642	Rpn2	-0.669562	8.31331	8.98293	-4.90487	0.000849662	0.0408877
ENSMUSG00000055493	Epm2a	-1.49376	1.83373	3.32451	-4.90117	0.000854001	0.0408877
ENSMUSG00000043301	Kcnj6	3.1296	0.837743	-2.2959	4.9001	0.000855256	0.0408877
ENSMUSG00000031387	Renbp	-0.92092	3.6553	4.57571	-4.89656	0.000859438	0.0408877
ENSMUSG00000022204	Ngdn	-0.778151	4.72965	5.50855	-4.89279	0.000863912	0.0408877
ENSMUSG00000038518	Jarid2	-0.662751	6.71095	7.37382	-4.88817	0.000869424	0.0408877
ENSMUSG00000025185	Loxl4	2.59926	1.18362	-1.4097	4.88767	0.000870022	0.0408877
ENSMUSG00000026895	Ndufa8	-0.711557	5.60801	6.31977	-4.88763	0.000870077	0.0408877
ENSMUSG00000105867	Gm42517	1.50154	3.33534	1.83745	4.87218	0.000888809	0.041421
ENSMUSG00000096054	Syne1	0.857748	7.10409	6.24615	4.8712	0.000890012	0.041421
ENSMUSG00000070337	Gpr179	2.55097	1.21727	-1.32936	4.86905	0.000892657	0.041421
ENSMUSG00000021794	Glud1	-0.687208	6.32578	7.01299	-4.86804	0.00089391	0.041421
ENSMUSG00000032245	Cln6	-1.12934	4.10985	5.23999	-4.86597	0.000896468	0.041421
ENSMUSG00000034647	Ankrd12	0.804936	5.92509	5.12038	4.85991	0.000904003	0.041571
ENSMUSG00000035914	Cd276	0.749755	5.67468	4.92514	4.85771	0.000906761	0.041571
ENSMUSG00000015656	Hspa8	-0.880788	8.81901	9.6995	-4.8561	0.000908772	0.041571
ENSMUSG00000022033	Pbk	-0.691267	5.17042	5.86145	-4.84533	0.000922418	0.041927
ENSMUSG00000030272	Camk1	-1.41245	3.43476	4.84624	-4.84494	0.000922912	0.041927
ENSMUSG00000042417	Ccno	2.36331	2.08555	-0.284237	4.84277	0.000925688	0.041927
ENSMUSG00000049323	Smcr8	0.792801	5.51705	4.72514	4.83165	0.000940056	0.0424381
ENSMUSG00000020473	Aebp1	0.714435	6.40975	5.69543	4.82502	0.000948748	0.0426003
ENSMUSG00000054409	Tmem74	0.735811	5.41868	4.68185	4.82344	0.000950825	0.0426003
ENSMUSG00000024957	Kcnk4	1.36329	2.98377	1.61604	4.82185	0.000952931	0.0426003
ENSMUSG00000032298	Neil1	-1.31644	2.94654	4.26416	-4.80949	0.000969415	0.0431031
ENSMUSG00000021313	Ryr2	1.08865	3.88671	2.79634	4.80795	0.000971499	0.0431031
ENSMUSG00000006818	Sod2	-0.65215	6.01381	6.66605	-4.80642	0.000973568	0.0431031
ENSMUSG00000026153	Fam135a	0.774431	6.79099	6.0163	4.79361	0.000991067	0.0436066
ENSMUSG00000036192	Rorb	0.875629	4.49811	3.62196	4.79225	0.00099294	0.0436066
ENSMUSG00000008658	Rbfox1	1.1054	3.64178	2.53421	4.78626	0.00100125	0.0436066
ENSMUSG00000085372	Gm16145	4.44786	-0.711926	-5.15881	4.78352	0.00100509	0.0436066
ENSMUSG00000024665	Fads2	-1.21522	6.48064	7.69655	-4.78223	0.00100689	0.0436066
ENSMUSG00000024525	Impa2	-0.970884	5.44755	6.41912	-4.78093	0.00100871	0.0436066
ENSMUSG00000009569	Mkl2	0.753425	5.54493	4.79142	4.7793	0.00101101	0.0436066
ENSMUSG00000021488	Nsd1	-2.32383	0.649668	2.97954	-4.77887	0.00101161	0.0436066
ENSMUSG00000020310	Madcam1	3.44217	2.88791	-0.564644	4.77601	0.00101566	0.0436066
ENSMUSG00000070305	Mpzl3	4.44589	-0.711926	-5.15881	4.77368	0.00101897	0.0436066
ENSMUSG00000055197	Fev	3.1862	2.11724	-1.0531	4.77282	0.00102019	0.0436066
ENSMUSG00000035615	Frmpd1	-1.14622	4.40499	5.55191	-4.76781	0.00102735	0.0436066
ENSMUSG00000032097	Ddx6	0.807467	7.19265	6.38556	4.76734	0.00102801	0.0436066
ENSMUSG00000036295	Lrrn3	0.766041	5.98299	5.21668	4.76429	0.0010324	0.0436066
ENSMUSG00000031246	Sh3bgrl	-0.746477	4.58109	5.32791	-4.76426	0.00103245	0.0436066
ENSMUSG00000042712	Tceal9	-0.930081	4.90432	5.83368	-4.75884	0.0010403	0.0437895
ENSMUSG00000020265	Sumo3	0.698942	7.19496	6.49597	4.75688	0.00104314	0.0437895
ENSMUSG00000039456	Morc3	0.6765	7.16597	6.4896	4.74984	0.00105346	0.0439504
ENSMUSG00000039485	Tspyl4	0.75253	6.61122	5.85802	4.74784	0.0010564	0.0439504
ENSMUSG00000022108	Itm2b	-0.687189	6.41762	7.10486	-4.74774	0.00105655	0.0439504
ENSMUSG00000020649	Rrm2	0.815015	7.26348	6.44812	4.74078	0.00106689	0.0440045
ENSMUSG00000025571	Tnrc6c	0.994426	7.56542	6.5716	4.73995	0.00106812	0.0440045
ENSMUSG00000085208	Brip1os	1.16669	4.89732	3.73423	4.73856	0.00107021	0.0440045
ENSMUSG00000022538	Lsg1	0.794465	6.8844	6.0894	4.7358	0.00107435	0.0440045
ENSMUSG00000015971	Actr8	-0.841088	4.03018	4.87245	-4.73461	0.00107614	0.0440045
ENSMUSG00000042626	Shc1	-1.1699	6.8473	8.0168	-4.73272	0.00107899	0.0440045
ENSMUSG00000037712	Fermt2	-0.632455	6.64944	7.28198	-4.72746	0.00108698	0.0440045
ENSMUSG00000045294	Insig1	-1.51132	6.1593	7.67171	-4.7249	0.00109088	0.0440045
ENSMUSG00000060962	Dmkn	-5.18437	-2.92011	2.2578	-4.72478	0.00109106	0.0440045
ENSMUSG00000000959	Oxa1l	-0.731543	6.30169	7.03327	-4.72384	0.0010925	0.0440045
ENSMUSG00000007594	Hapln4	1.14388	3.29715	2.154	4.72351	0.001093	0.0440045
ENSMUSG00000020723	Cacng4	0.7207	6.26547	5.54374	4.71537	0.00110556	0.0443804
ENSMUSG00000042156	Dzip1	-1.01712	3.7804	4.79951	-4.70632	0.0011197	0.0446753
ENSMUSG00000068735	Trp53i11	-0.93419	7.20266	8.13732	-4.70498	0.0011218	0.0446753
ENSMUSG00000024369	Nelfe	-0.695134	5.19455	5.89004	-4.69745	0.00113374	0.0446753
ENSMUSG00000032252	Glce	0.765769	6.35369	5.58853	4.69635	0.00113549	0.0446753
ENSMUSG00000100826	Snhg14	-1.30932	2.26469	3.57189	-4.69529	0.00113719	0.0446753
ENSMUSG00000022961	Son	0.724735	8.53883	7.81404	4.6948	0.00113796	0.0446753
ENSMUSG00000055172	C1ra	-2.64694	0.33005	2.98142	-4.69398	0.00113928	0.0446753
ENSMUSG00000061458	Nol10	0.659921	6.49818	5.83805	4.69344	0.00114014	0.0446753
ENSMUSG00000027994	Mcub	-0.929884	5.06187	5.99245	-4.69221	0.00114211	0.0446753
ENSMUSG00000021494	Ddx41	-0.740052	5.04309	5.78362	-4.68858	0.00114797	0.0447772
ENSMUSG00000015932	Dstn	-0.617395	6.30906	6.92647	-4.68389	0.00115556	0.0448272
ENSMUSG00000031232	Magt1	-0.86989	4.31542	5.18424	-4.68377	0.00115576	0.0448272
ENSMUSG00000022623	Shank3	1.70446	2.42687	0.727513	4.67149	0.00117592	0.045346
ENSMUSG00000023236	Scg5	-1.09835	5.47288	6.571	-4.67008	0.00117827	0.045346
ENSMUSG00000004665	Cnn2	-0.743191	6.38095	7.12404	-4.66963	0.00117902	0.045346
ENSMUSG00000031608	Galnt7	0.651659	6.02651	5.37491	4.66507	0.00118662	0.0455013
ENSMUSG00000025289	Prdx4	-0.704271	6.63662	7.34103	-4.66325	0.00118966	0.0455013
ENSMUSG00000034714	Ttyh2	-0.750525	5.36083	6.1108	-4.65887	0.00119705	0.0456568
ENSMUSG00000021832	Psmc6	-0.662178	6.00822	6.67033	-4.65254	0.00120778	0.045913
ENSMUSG00000027737	Slc7a11	1.30291	7.01614	5.71119	4.64612	0.00121878	0.045913
ENSMUSG00000026806	Ddx31	0.758868	5.0209	4.26143	4.646	0.00121899	0.045913
ENSMUSG00000021067	Sav1	-1.24431	2.74842	3.99116	-4.64248	0.00122508	0.045913
ENSMUSG00000022110	Sucla2	-0.83243	4.70439	5.5365	-4.64173	0.00122637	0.045913
ENSMUSG00000037617	Spag1	1.00355	4.27947	3.27695	4.64116	0.00122737	0.045913
ENSMUSG00000021242	Npc2	-0.863101	6.11059	6.97377	-4.63962	0.00123004	0.045913
ENSMUSG00000032606	Nicn1	-0.794191	4.68729	5.48158	-4.63939	0.00123044	0.045913
ENSMUSG00000026670	Uap1	-0.651462	5.47513	6.12674	-4.62303	0.00125927	0.0467726
ENSMUSG00000024791	Cdca5	-0.86952	4.47249	5.34232	-4.62138	0.00126221	0.0467726
ENSMUSG00000015942	Gtf2ird2	1.68442	3.58073	1.89299	4.62057	0.00126367	0.0467726
ENSMUSG00000032727	Mier3	0.784776	5.89681	5.1115	4.60887	0.00128479	0.0469734
ENSMUSG00000032295	Man2c1	-0.7099	5.90024	6.6103	-4.60781	0.00128673	0.0469734
ENSMUSG00000018340	Anxa6	-0.749246	7.39413	8.14299	-4.60748	0.00128734	0.0469734
ENSMUSG00000039849	Pcif1	-1.00584	5.20819	6.21484	-4.60654	0.00128904	0.0469734
ENSMUSG00000005470	Asf1b	-0.77059	5.52864	6.29938	-4.60434	0.00129309	0.0469734
ENSMUSG00000035686	Thrsp	-4.55197	-4.17136	0.371618	-4.603	0.00129555	0.0469734
ENSMUSG00000039058	Ak5	1.74686	3.35901	1.61237	4.60276	0.00129598	0.0469734
ENSMUSG00000038515	Grtp1	1.50272	2.32011	0.818473	4.60177	0.0012978	0.0469734
ENSMUSG00000002346	Slc25a42	-1.44504	1.80677	3.25539	-4.60034	0.00130043	0.0469734
ENSMUSG00000021901	Bap1	-0.627198	5.9272	6.55446	-4.59761	0.00130549	0.0469734
ENSMUSG00000092035	Peg10	0.689307	6.31681	5.62831	4.597	0.00130662	0.0469734
ENSMUSG00000037697	Ddhd1	-0.914861	4.55514	5.47119	-4.5929	0.00131425	0.0470263
ENSMUSG00000022704	Qtrt2	0.689719	5.84525	5.15527	4.59254	0.00131492	0.0470263
ENSMUSG00000086784	Isoc2a	-0.977514	3.94021	4.91676	-4.58814	0.00132318	0.0471991
ENSMUSG00000098923	Tmem185b	1.04336	5.10089	4.05523	4.57487	0.00134838	0.0478306
ENSMUSG00000021903	Galnt15	-1.31179	2.18401	3.49802	-4.5721	0.00135372	0.0478306
ENSMUSG00000049755	Zfp672	1.11881	4.91681	3.8038	4.57081	0.00135621	0.0478306
ENSMUSG00000026107	Nabp1	0.7397	5.86929	5.13002	4.56932	0.00135909	0.0478306
ENSMUSG00000032265	Fam46a	0.636127	5.85277	5.21696	4.56853	0.00136062	0.0478306
ENSMUSG00000001707	Eef1e1	0.66542	6.11452	5.44828	4.56796	0.00136173	0.0478306
ENSMUSG00000021185	9030617O03Rik	-1.30016	2.65104	3.9526	-4.56061	0.00137607	0.047848
ENSMUSG00000022914	Brwd1	0.744586	6.61093	5.86643	4.56017	0.00137692	0.047848
ENSMUSG00000027605	Acss2	-1.44039	4.37874	5.81639	-4.55943	0.00137838	0.047848
ENSMUSG00000015619	Gata3	0.818546	5.86766	5.05074	4.55893	0.00137936	0.047848
ENSMUSG00000029603	Dtx1	1.03538	4.58004	3.54847	4.55881	0.00137959	0.047848
ENSMUSG00000022536	Glyr1	0.695333	7.39574	6.70047	4.55332	0.00139045	0.0480915
ENSMUSG00000001025	S100a6	-0.983501	5.49994	6.48365	-4.55173	0.0013936	0.0480915
ENSMUSG00000022364	Tbc1d31	-0.642427	7.22248	7.8649	-4.54612	0.0014048	0.0482926
ENSMUSG00000062115	Rai1	0.730086	8.06324	7.33299	4.54223	0.00141264	0.0482926
ENSMUSG00000021996	Esd	-0.680475	5.01284	5.69305	-4.54188	0.00141333	0.0482926
ENSMUSG00000009378	Slc16a12	1.41635	3.75156	2.34057	4.54175	0.0014136	0.0482926
ENSMUSG00000038622	Med30	-0.863039	4.60823	5.47163	-4.53931	0.00141853	0.0482926
ENSMUSG00000044646	Zbtb7c	1.21893	3.11768	1.90083	4.53736	0.00142249	0.0482926
ENSMUSG00000086395	A630014C17Rik	4.46163	0.456157	-4.00566	4.53663	0.00142398	0.0482926
ENSMUSG00000022805	Maats1	1.46476	3.05929	1.59039	4.52997	0.00143759	0.0484511
ENSMUSG00000034832	Tet3	0.681476	7.56062	6.87923	4.5286	0.00144042	0.0484511
ENSMUSG00000086043	Gm12473	3.66406	0.329112	-3.32819	4.52813	0.00144138	0.0484511
ENSMUSG00000079350	Magea8	1.98249	1.7844	-0.192716	4.52748	0.00144273	0.0484511
ENSMUSG00000009145	Dqx1	0.934731	4.28761	3.35654	4.51606	0.0014665	0.0491294
ENSMUSG00000027612	Mmp24	1.10604	4.22044	3.11025	4.51141	0.0014763	0.0492844
ENSMUSG00000021993	Mipep	-0.749482	4.85781	5.60728	-4.51047	0.00147828	0.0492844
ENSMUSG00000004044	Cavin1	1.25801	3.80039	2.54276	4.5038	0.00149249	0.0496379
ENSMUSG00000016496	Cd274	0.798275	4.66543	3.86609	4.50003	0.00150057	0.0497865
ENSMUSG00000058019	Ces5a	2.5563	1.02748	-1.53305	4.49638	0.00150846	0.0498367
ENSMUSG00000034158	Lrrc58	0.724156	7.01328	6.28966	4.49263	0.00151661	0.0498367
ENSMUSG00000029162	Khk	-1.42771	1.70657	3.13686	-4.49241	0.00151707	0.0498367
ENSMUSG00000055128	Cgrrf1	-0.993339	3.06932	4.06075	-4.48998	0.00152239	0.0498367
ENSMUSG00000038859	Baiap2l1	-0.641411	8.23874	8.88039	-4.48918	0.00152412	0.0498367
ENSMUSG00000003868	Ruvbl2	-0.756323	6.54437	7.30087	-4.48857	0.00152547	0.0498367
ENSMUSG00000001016	Ilf2	-0.695858	5.82707	6.52306	-4.48763	0.00152754	0.0498367
ENSMUSG00000015452	Ager	1.26593	2.75492	1.4896	4.48603	0.00153104	0.0498367
ENSMUSG00000090946	Ccdc71l	1.20001	5.46342	4.26212	4.484	0.00153552	0.0498645
ENSMUSG00000016319	Slc25a5	-0.767068	6.94881	7.71573	-4.48074	0.00154272	0.0499804
Gene id, Ensembl gene id; Symbol, official gene name; logFC, log2 fold change; AveExpr.1 and AveExpr.2, mean expression level in KD and WT samples respectively; t, t statistic of the differential expression test; P.Value, p value significance of the test; adj.P.Val, false discovery rate adjusted P value.
